# Supplementary material for: Pollutants: a candidate as a new risk factor for osteoarthritis—results from a systematic literature review
Source: HighWire-hosted journal article supplement (doi:10.1136/rmdopen-2021-001983), 2022-06-01
Supplement: rmdopen-2021-001983supp001_data_supplement.pdf [file rmdopen-2021-001983supp001_data_supplement.pdf]

**Table 1: Epidemiological clinical studies.**

| Author, year of publication  | Type of study<br>Country, year                                                                                             | Participants<br>Number of patients (n) | Type of OA and method of evaluation | Type of Pollutant and method to determine exposure                  | Available Results                                                                                  | Potential bias                                                                                                                          |
|------------------------------|----------------------------------------------------------------------------------------------------------------------------|----------------------------------------|-------------------------------------|---------------------------------------------------------------------|----------------------------------------------------------------------------------------------------|-----------------------------------------------------------------------------------------------------------------------------------------|
| Kanagawa, 2008 <sup>15</sup> | Cross-sectional<br>From the Yucho patients: post mass poisoning in 1968 (contamination of oil)<br>Western Japan, 2001-2004 | n=501                                  | "Arthralgia"<br>Self-reported       | PCB, PCQ, PCDF<br>Serum concentration                               | Arthralgia correlated with PCB/PCQF and PCQ blood concentration<br>Wald test between 4 and 10      | Cross-sectional<br>No precision of OA<br>Questionnaire<br>No comparison exposed/non exposed (only correlation with blood concentration) |
| Guo, 1999 <sup>14</sup>      | Cross-sectional<br>From the Yucheng registry: post mass poisoning in 1979 (contamination of oil)<br>Taiwan, 1993           | n=795 cases<br>n= 693 controls         | "Arthritis"<br>Self-reported        | PCB<br>Patients of a register (use of contaminated oil for cooking) | Arthritis in PCB/PCDF exposed vs non-exposed: OR = 4.1 (1.8-11.2) for men, 1.3 (0.8-2.3) for women | Cross-sectional<br>No precision of OA<br>Questionnaire                                                                                  |

|                              |                                                                                                        |                                                                                                                  |                                                                                                        |                                                                                                 |                                                                                                                                                                                                                                                                                                    |                                                                                                                                   |
|------------------------------|--------------------------------------------------------------------------------------------------------|------------------------------------------------------------------------------------------------------------------|--------------------------------------------------------------------------------------------------------|-------------------------------------------------------------------------------------------------|----------------------------------------------------------------------------------------------------------------------------------------------------------------------------------------------------------------------------------------------------------------------------------------------------|-----------------------------------------------------------------------------------------------------------------------------------|
| Anderson, 1978 <sup>16</sup> | Cross-sectional<br>Consumption of contaminated produce (meat, milk, dairy products, eggs)<br>USA, 1978 | n=933 cases in Michigan: farmers, consumers of produce bought directly from farms<br>n=228 controls in Wisconsin | Self-reported + physical examination<br>joint pain, joint swelling, deformation                        | PCB<br>Patients of a register (consumption of contaminated farm produce)<br>Serum concentration | Arthritis in PCB exposed vs non-exposed: higher prevalence of musculo-skeletal symptoms, $\chi^2 = 3.8$ , $p = 0.05$<br>Current degenerative arthritis under treatment : 10.3% in cases, 17% in controls, $\chi^2 = 4.22$ , $p < 0.05$                                                             | Cross-sectional<br>No precision of OA<br>Questionnaire<br>Young age of participants: OA ?<br>No results about serum concentration |
| Lee, 2007 <sup>17</sup>      | Cross-sectional<br>NHANES<br>USA,<br>1999-2002                                                         | n=116 OA<br>n=414 arthritis<br>n=1721<br>participants to blood sample for POP in NHANES                          | Self-reported NHANES standardized home interview + physical examination<br>No precision of the OA site | POP : PCDD, PCDF, dioxin like PCB, nondioxin like PCB, OC pesticides<br>Serum concentration     | Arthritis in POP exposed vs non-exposed : statistical association only for 5/9 subtypes of PCB and ¼ subtype of OC pesticides<br>Maximal aOR = 3.2 (1.5-6.7), $p < 0.01$ for PCB; 3.1 (1.3-7.1) for OC pesticides<br>Statistical association only in women<br>RA: significant association; OA : no | Cross-sectional<br>Questionnaire                                                                                                  |

|                           |                                                                           |                                                                                                           |              |                                                            |                                | statistically significant association                                                                                                                                                                                                                    |                                  |
|---------------------------|---------------------------------------------------------------------------|-----------------------------------------------------------------------------------------------------------|--------------|------------------------------------------------------------|--------------------------------|----------------------------------------------------------------------------------------------------------------------------------------------------------------------------------------------------------------------------------------------------------|----------------------------------|
| Innes, 2011 <sup>18</sup> | Cross-sectional<br>Consumption of contaminated water<br>USA,<br>2005-2006 | n=3731<br>n=49 432<br>participants to C8 Health Project                                                   | OA<br>Health | Self-reported questionnaire<br>No precision of the OA site | PFOA, PFOS serum concentration | OA in PFOA/PFOS exposed vs non-exposed :<br><br>PFOA : fully aOR = 1.42 (1.26-1.59) p=0.00001<br><br>PFOS : fully aOR = 0.76 (0.68-0.85) p=0.00001                                                                                                       | Cross-sectional<br>Questionnaire |
| Uhl, 2013 <sup>19</sup>   | Cross-sectional<br>NHANES<br>USA,<br>2003-2008                            | n=365 OA<br>n=4102<br>participants with PFOA/PFOS serum concentration and OA status information in NHANES |              | Self-reported NHANES questionnaire                         | PFOA, PFOS serum concentration | OA in PFOA/PFOS exposed vs non-exposed : :<br><br>PFOA : OR = 1.62 (1.10-2.39) p<0.05; fully aOR = 1.55 (0.99-2.43)<br><br>Women 1.98 (1.24-3.19); men 0.82 (0.40-1.70)<br><br>PFOS : OR = 2.16 (1.37-3.39) p<0.01; fully aOR = 1.77 ( 1.05-2.96) p<0.05 | Cross-sectional<br>Questionnaire |

|                                 |                                                                                         |                                                                                                |                                        |                                |                                                                                                                                                                                      |                                                             |
|---------------------------------|-----------------------------------------------------------------------------------------|------------------------------------------------------------------------------------------------|----------------------------------------|--------------------------------|--------------------------------------------------------------------------------------------------------------------------------------------------------------------------------------|-------------------------------------------------------------|
|                                 |                                                                                         |                                                                                                |                                        |                                | Women 1.73 (0.97-3.10); men 1.56 (0.54-4.53)                                                                                                                                         |                                                             |
| Kim, 2018 <sup>20</sup>         | Cross-sectional<br>KNHANES<br>Korea,<br>2010-2012                                       | n=2388<br>participants<br>with lead serum<br>concentration<br>status                           | Knee OA<br>Radiological<br>examination | Lead<br>Serum<br>concentration | Knee OA in lead<br>exposed vs non-<br>exposed: aOR = 1.90<br>(1.09-3.32) in men, 1.81<br>(1.17-2.77) in women                                                                        | Cross-sectional                                             |
| Nelson, 2011 <sup>21</sup>      | Cross-sectional<br>Johnston<br>County<br>Osteoarthritis<br>Project<br>USA,<br>2003-2004 | n=1669<br>participants<br>with lead serum<br>concentration<br>status<br><br>n=1635 knee<br>rOA | Knee OA<br>Radiological<br>examination | Lead<br>Serum<br>concentration | Knee OA in lead<br>exposed vs non-<br>exposed: aOR = 1.20<br>(1.01-1.44), aOR of<br>having bilateral knee<br>OA = 1.32 (1.03-1.70)                                                   | Cross-sectional                                             |
| Abo-Elmaaty, 2017 <sup>22</sup> | Cross-sectional<br>Egypt,<br>2014-2015                                                  | n=90 knee OA                                                                                   | Knee OA<br>Radiological<br>examination | Lead<br>Serum<br>concentration | aOR for symptomatic<br>knee OA = 1.16 (0.93-<br>1.45). The higher the<br>lead serum<br>concentration is, the<br>higher aOR is. Lead<br>serum concentration is<br>correlated with the | Small sample size<br>Cross-sectional<br>No healthy controls |

|                            |                                                                                           |                                                                                            |         |                                                                  |                                                                                                                                                                                                                                                                                                         |
|----------------------------|-------------------------------------------------------------------------------------------|--------------------------------------------------------------------------------------------|---------|------------------------------------------------------------------|---------------------------------------------------------------------------------------------------------------------------------------------------------------------------------------------------------------------------------------------------------------------------------------------------------|
|                            |                                                                                           |                                                                                            |         |                                                                  | severity of knee OA either clinically and radiographically : WOMAC / lead level $r=0.403$ , $p<0.001$ ; KL scoring / lead level $r=0.643$ , $p<0.001$                                                                                                                                                   |
| Wang, 2010 <sup>24</sup>   |                                                                                           | n=3 knee OA<br><br>n=2 immune humatism                                                     | Knee OA | BPA serum and synovial fluid concentration                       | Presence of BPA in serum of OA patients vs absence in serum of immune rheumatism patients                                                                                                                                                                                                               |
| Nelson, 2011 <sup>23</sup> | From Johnston County Osteoarthritis Project<br><br>North California, USA<br><br>2003-2004 | n=671 participants with lead serum concentration and biomarkers of joint tissue metabolism | Knee OA | Lead Serum concentration<br><br>Serum and urine joint biomarkers | Biomarkers in lead exposed vs non-exposed : NTX: aOR = 1.45 (1.21-1.74) for women, 1.06 (0.95-1.18) for men; CTX: aOR = 1.28 (1.04-1.58) for women, 1.07 (0.97-1.18) for men; COMP : aOR = 0.96 (0.87-1.06) in women, 1.08 (1.00-1.18) in men<br><br>Biomarkers used are biomarkers of bone tissue also |

|                                            |                                                                                                                                                                                                 |           |                                        |                                                                                                                                                                                                                                                       |                                                               |
|--------------------------------------------|-------------------------------------------------------------------------------------------------------------------------------------------------------------------------------------------------|-----------|----------------------------------------|-------------------------------------------------------------------------------------------------------------------------------------------------------------------------------------------------------------------------------------------------------|---------------------------------------------------------------|
| Yamamoto ,2018<br>(abstract) <sup>25</sup> | SAGE (World n=NA<br>Health<br>Organization<br>Study on Global<br>AGEing and<br>Adult Health)<br><br>China, Ghana,<br>India, Mexico,<br>Russian<br>federation,<br>South Africa,<br><br>2007-2010 | Arthritis | Air pollution<br>cooking<br>activities | Arthritis in household air<br>pollution exposed vs<br>non-exposed<br>(electricity) :<br><br>aOR for<br>gas/kerosene/paraffin =<br>1.73 (1.33-2.25), for<br>coal/charcoal/wood =<br>1.73 (1.32-2.27), for<br>agriculture/crop... =<br>2.00 (1.47-2.72) | All confounding factors<br>probably not taken into<br>account |
|--------------------------------------------|-------------------------------------------------------------------------------------------------------------------------------------------------------------------------------------------------|-----------|----------------------------------------|-------------------------------------------------------------------------------------------------------------------------------------------------------------------------------------------------------------------------------------------------------|---------------------------------------------------------------|

OA: osteoarthritis, rOA: radiologicOA, OR: odds ratio, aOR: adjusted odds ratio, PCB: polychlorinated biphenyls, PCQ: polychlorinated quarterphenyls, PCDF: polychlorinated dibenzofurans, PFOA: perfluorooctanoate, PFOS: perfluorooctane sulfonate, POP: persistent organic pollutants, PCDD: polychlorinated dibenzo-p-dioxins, PCDF: polychlorinated dibenzofurans, RA :rheumatoid arthritis, WOMAC: the Western Ontario and Mc Master Universities Osteoarthritis Index, KL: Kellgren-Lawrence, NA: not available, NTX: urinary cross-linked N telopeptide, CTX :C- telopeptide fragments, COMP: cartilage oligometric matrix protein.
