# Supplementary material for: Pollutants: a candidate as a new risk factor for osteoarthritis—results from a systematic literature review
Source: HighWire-hosted journal article supplement (doi:10.1136/rmdopen-2021-001983), 2022-06-01
Supplement: rmdopen-2021-001983supp002_data_supplement.pdf [file rmdopen-2021-001983supp002_data_supplement.pdf]

**Table 2 : Pollutant concentrations in ex vivo OA joint tissues.**

| Author and year of publication            | Participants, Country                            | Type of OA and method of sampling                | Pollutant and method to evaluation of accumulation | Main results                                                                                                                                                                                                                                                                                                   | Potential bias                                                      |
|-------------------------------------------|--------------------------------------------------|--------------------------------------------------|----------------------------------------------------|----------------------------------------------------------------------------------------------------------------------------------------------------------------------------------------------------------------------------------------------------------------------------------------------------------------|---------------------------------------------------------------------|
| Brodziak-Dopierala<br>2011 <sup>26</sup>  | n=53 patients<br>Poland<br>Industrial area       | Hip OA<br>Samples harvested during arthroplasty  | Lead<br>Spectrometry                               | <u>Lead</u> : Higher concentration in cancellous bone than in cartilage.<br><br>No correlation with sex.<br><br>Concentration increase with age in cartilage.                                                                                                                                                  | Small sample<br>No comparison with non OA joint<br>Only one country |
| Lanocha-Arendarczyk<br>2015 <sup>28</sup> | n=33 patients<br>n=28 OA<br>n=5 injury<br>Poland | Knee OA<br>Samples harvested during arthroplasty | Lead and other 9 chemical elements<br>Spectrometry | <u>Fluor</u> : Higher concentration in bone of OA knee than in injury knee U=29, p<0.01<br><br><u>Lead</u> : higher concentration :<br><br>- in men than women U=48, p=0.01<br><br>- in smokers than non-smokers U=49, p=0.001<br><br><u>Mercury</u> : Higher concentration in fish and seafood consumers than | Small sample<br>Only one country<br>Many sub analyses               |

|                                     |                         |                                                               |                                                                |                                                                                                                                                                                                                                                                                                                                                                           |                                                                     |
|-------------------------------------|-------------------------|---------------------------------------------------------------|----------------------------------------------------------------|---------------------------------------------------------------------------------------------------------------------------------------------------------------------------------------------------------------------------------------------------------------------------------------------------------------------------------------------------------------------------|---------------------------------------------------------------------|
|                                     |                         |                                                               |                                                                | non-consumers U=71.5,<br>p<0.04                                                                                                                                                                                                                                                                                                                                           |                                                                     |
| Kosik-Bogacka<br>2018 <sup>27</sup> | n=30 patients<br>Poland | Knee OA<br><br>Samples<br>harvested<br>during<br>arthroplasty | Lead and other 3<br>chemical elements<br><br>Spectroscopy      | <p><u>Lead</u> _____: higher concentration</p> <p>- in patients over 65 years old than under age 65 (2.5 times higher, p=0.02)</p> <p>- in cartilage than meniscus U=14.5</p> <p>No statistically significant correlation with sex</p> <p><u>Magnesium and zinc</u> : higher concentration</p> <p>- in men than women U=27</p> <p>- in cartilage than meniscus U = 32</p> | Small sample<br>Only one country<br>No comparison with non OA joint |
| Kwapulinski<br>1995 <sup>63</sup>   | n=49 patients<br>Poland | Hip OA<br><br>Samples<br>harvested                            | Lead and other 8<br>chemical elements<br><br>Spectrophotometry | <p><u>All chemical elements</u> : Higher concentration in cartilage than cortical and cancellous bone</p>                                                                                                                                                                                                                                                                 | Small sample<br>Only one country                                    |

|                                                              |                                          |                                                         |                                                                  |                                                                                                                                                                                                                                                                                                                  |                                                                          |
|--------------------------------------------------------------|------------------------------------------|---------------------------------------------------------|------------------------------------------------------------------|------------------------------------------------------------------------------------------------------------------------------------------------------------------------------------------------------------------------------------------------------------------------------------------------------------------|--------------------------------------------------------------------------|
|                                                              |                                          | during arthroplasty                                     |                                                                  | Lead : cartilage 95.58 (VC 0.17) vs cancellous bone 88.57 (VC 0.08)                                                                                                                                                                                                                                              | No comparison with non OA joint                                          |
|                                                              |                                          |                                                         |                                                                  | Correlation with concentration of lead in air                                                                                                                                                                                                                                                                    |                                                                          |
| Lanocha 2012 <sup>29</sup><br>and Lanocha 2013 <sup>30</sup> | n=37 patients<br>Poland                  | Hip OA<br>Samples harvested during arthroplasty         | Lead, cadmium, mercury, copper, zinc<br>Spectrophotometry        | <u>Mercury, copper, zinc</u> :<br>Higher concentration:<br>- in cartilage than cancellous bone U=467, p<0.02<br><br>- if dental amalgam<br><br><u>Lead</u> : NS difference cartilage vs bone<br><br>Higher concentration:<br>- in men than women U=79, p=0.02,<br><br>- in smokers vs non-smokers U = 21, p<0.05 | Small sample<br>Only one country<br>No comparison with non OA joint      |
| Roschger 2013 <sup>31</sup>                                  | n=4 cadavers<br>n= 5 patients<br>Austria | 7 femoral heads, 2 patellas<br>harvested during autopsy | Lead, zinc<br>X-ray fluorescence<br>Examination of tidemark (TM) | <u>Lead</u> : 35 fold higher in the TM than in the bone<br><br><u>Zinc</u> : 5 fold higher in the TM than in the bone                                                                                                                                                                                            | Very small sample<br>Only one country<br>No comparison with non OA joint |

|                              |                             | or arthroplasty<br>(fractures)                                                  |                                                                                      |                                                                     |                                                                                     |
|------------------------------|-----------------------------|---------------------------------------------------------------------------------|--------------------------------------------------------------------------------------|---------------------------------------------------------------------|-------------------------------------------------------------------------------------|
| Zoeger<br>2006 <sup>32</sup> | n=5 cadavers<br><br>Austria | 4 femoral<br>heads, 3<br>patellas<br><br>harvested<br>during autopsy<br>(no OA) | Lead, zinc,<br>strontium, calcium<br><br>X-ray fluorescence<br><br>Examination of TM | <u>Lead</u> : 13 fold higher<br>level in the TM than in<br>the bone | Very small sample<br><br>Only one country<br><br>No comparison with non<br>OA joint |

OA: osteoarthritis, U: Mann-Whitney U test, NS: not statistically significant, TM: tidemark, VC: variation coefficient
